# Supplementary material for: Expression quantitative trait locus mapping of extracellular microRNAs in human plasma
Source: PubMed Central journal article supplement — iScience. 2024 Sep 18;27(10):110988. doi: 10.1016/j.isci.2024.110988 (PMC11471191; doi:10.1016/j.isci.2024.110988), 2024-09-18

## **Supplemental information**

### **Expression quantitative trait locus mapping of extracellular microRNAs in human plasma**

**Tianxiao Huan (郇天笑), Roby Joehanes, Jian Rong (戎鎔), Ming-Huei Chen (陳明暉), Rima Mustafa, Abbas Dehghan, Mohsen Ghanbari, Hannah Karlin, Shih-Jen Hwang, Paul Courchesne, Martin G. Larson, Andrew D. Johnson, Jane E. Freedman, and Daniel Levy**

**Figure S1. Distribution of plasma ex-miRNA expression in 4,440**

**Framingham Heart Study participants.** A) The histogram illustrates the distribution of expressed ex-miRNAs across different numbers of samples. B) The histogram illustrates the distribution of expressed ex-miRNAs across different Ct value ranges. Expressed ex-miRNAs were defined as having Ct values  $\leq 34$ . The counts of expressed miRNAs within each bin are labeled at the top of their respective bars.

**A**

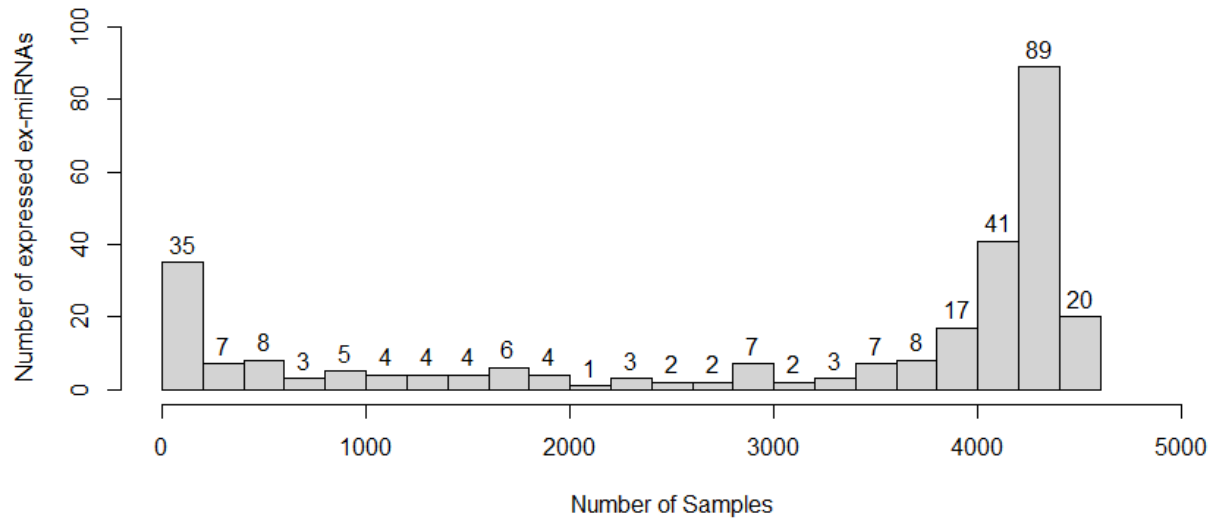

**B**

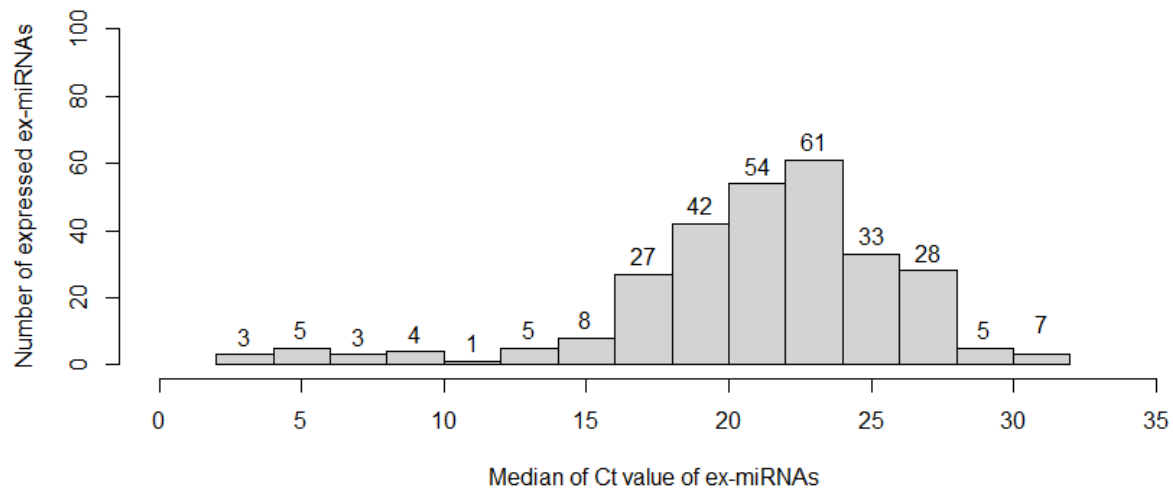

**Figure S2. Distribution of *cis*-exQTLs.** A) The histogram illustrates the number of *cis*-exQTL SNPs per miRNA; B) The histogram illustrates the distribution of the number of miRNA per *cis*-exQTL SNP vs. the number of *cis*-exQTL SNP per miRNA.

**A**

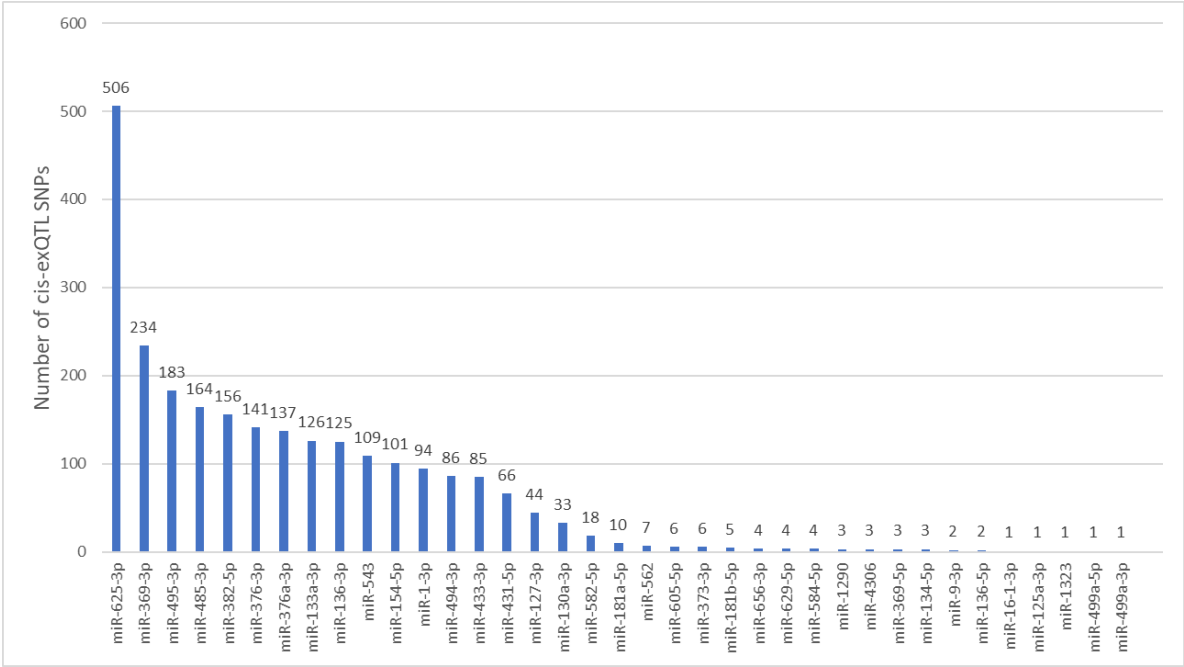

**B**

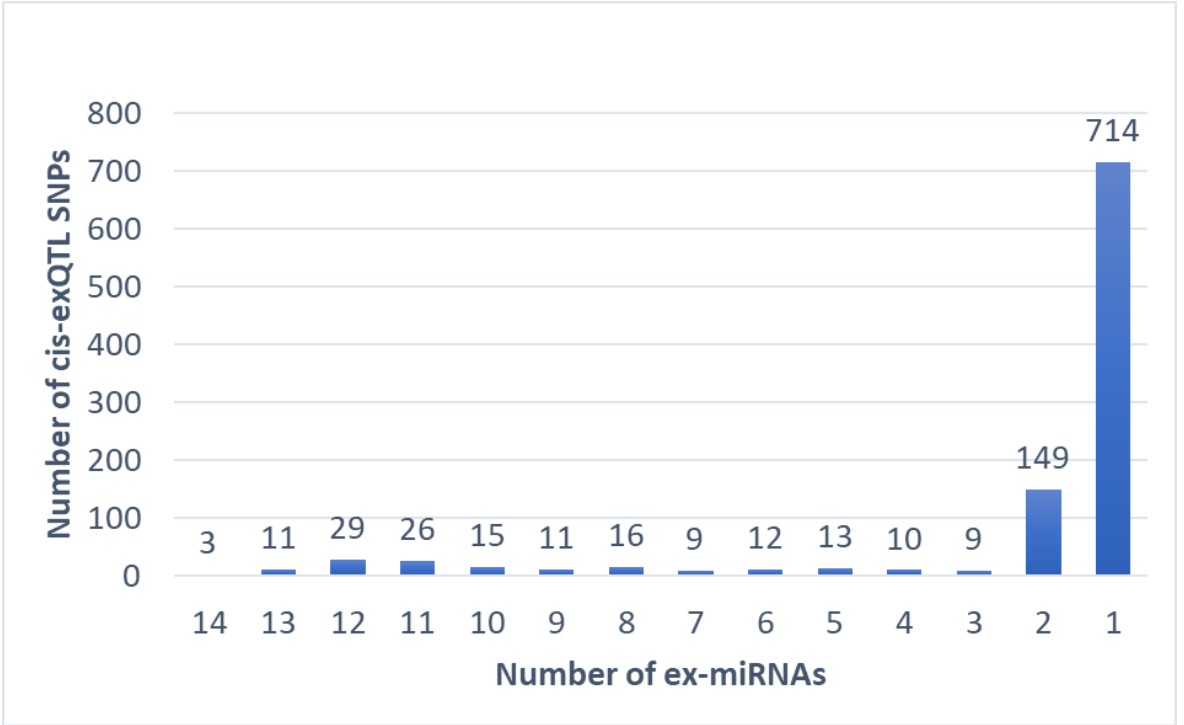

**Figure S3. A heatmap of ex-miRNAs in chr14 sharing *cis*-exQTL variants.** The color gradient represents the similarity score between any two miRNAs (e.g., miRNA A and miRNA B), calculated as the ratio of overlapped *cis*-exQTLs to the union of *cis*-exQTLs of miRNA A and miRNA B. miR-625-3p is situated on chromosome 14q23, while the remaining 17 miRNAs are located on chromosome 14q32.

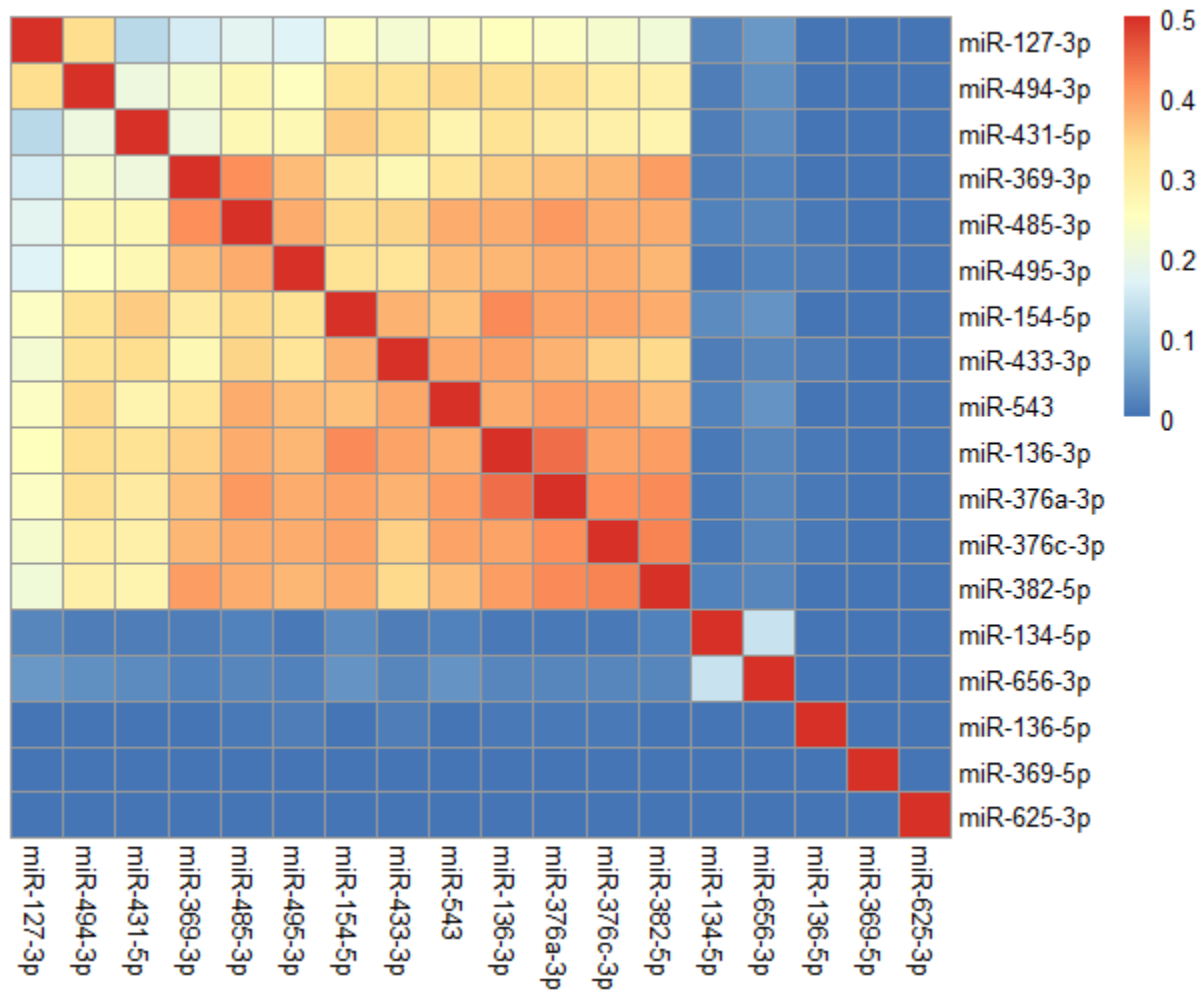

**Figure S4. The T values of exQTLs in all participants compared to the Generation Third cohort from FHS.** A) *cis*-exQTLs; B) *trans*-exQTLs. Each dot represents an exQTL with a significance threshold of  $P < 1e-4$ , with red dots indicating exQTLs passing the Bonferroni correction threshold ( $P < 5e-8$  for *cis* and  $P < 1.78e-10$  for *trans*).

**A**

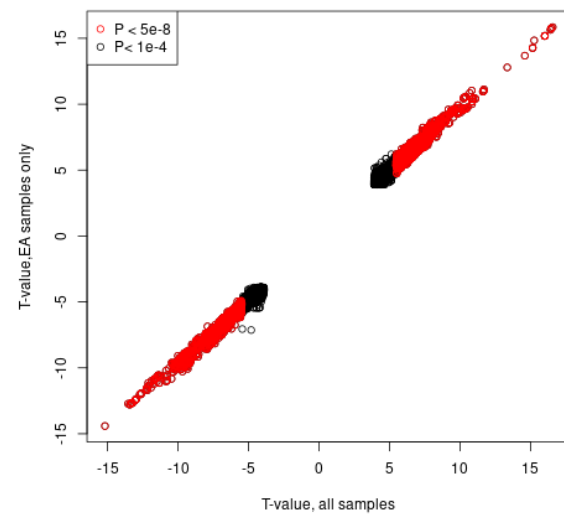

**B**

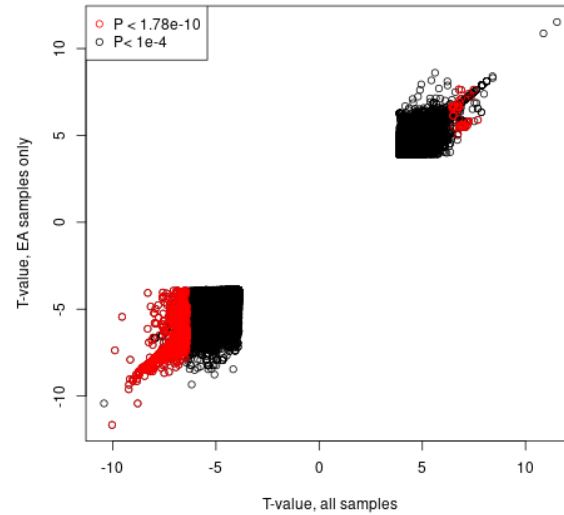

**Figure S5. *cis*-exQTL variants minor allele frequency vs. effect size.** Minor allele frequency of sentinel *cis*-exQTL variants (X-axis) vs. effect size of variants on ex-miRNAs.

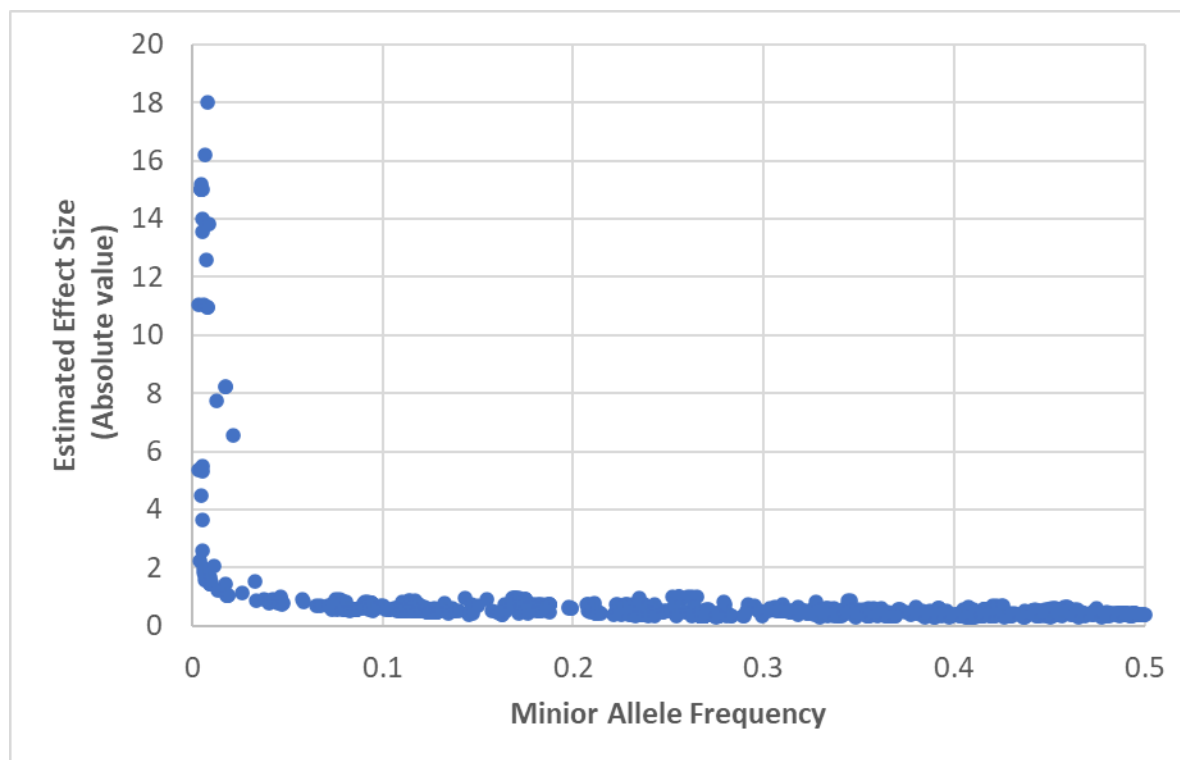

**Figure S6. Distribution of coexpressed ex-miRNAs with different number of mRNAs.** The counts of coexpressed ex-miRNAs within each bin are labeled at the top of their respective bars. The histogram illustrates most of ex-miRNA (N=212) coexpressed with less than 200 mRNAs. And, a few (N=14) coexpressed with more than 1000 mRNAs.

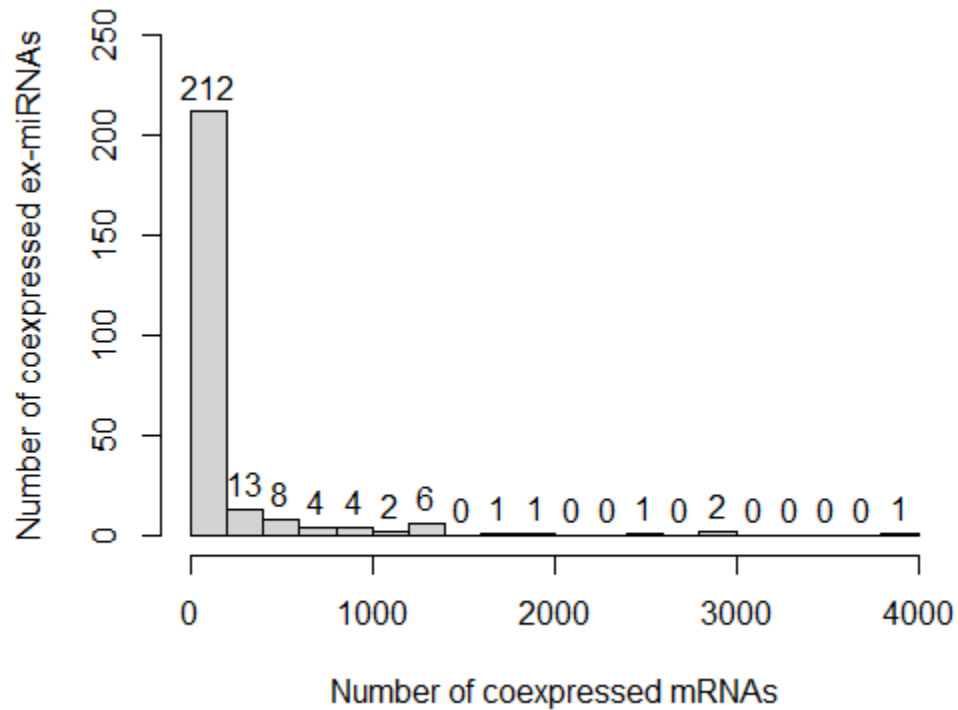

Supplement: mmc1.pdf [file mmc1.pdf]
